# Supplementary material
Source: PubMed Central journal article supplement (PMC8792280)
Supplement: NIHMS1763161-supplement-supinfo.pdf [file NIHMS1763161-supplement-supinfo.pdf]

**Supplementary materials for:**

**Breaking the fibrinolytic speed limit with microwheel co-delivery of tissue plasminogen activator and plasminogen**

Dante Disharoon<sup>†</sup>, Brian G. Trewyn<sup>‡</sup>, Paco S. Herson<sup>§</sup>, David W.M. Marr<sup>\*,†</sup>, and Keith B. Neeves<sup>\*,¶</sup>

<sup>†</sup>Department of Chemical and Biological Engineering, Colorado School of Mines, Golden, CO 80401, United States

<sup>‡</sup>Department of Chemistry, Colorado School of Mines, Golden, CO 80401, United States

<sup>§</sup>Department of Anesthesiology, University of Colorado Denver | Anschutz Medical Campus, Aurora, CO, 80045, United States

<sup>¶</sup>Departments of Bioengineering and Pediatrics, Hemophilia and Thrombosis Center, University of Colorado Denver | Anschutz Medical Campus, Aurora, CO 80045, United States

Correspondence:

Keith B. Neeves, Ph.D.

Departments of Bioengineering and Pediatrics

University of Colorado Denver | Anschutz Medical Campus

12800 E. 19<sup>th</sup> St.

Aurora, CO 80045

Email: [keith.neeves@cuanschutz.edu](mailto:keith.neeves@cuanschutz.edu)

David W.M. Marr, Ph.D

Department of Chemical and Biological Engineering

Colorado School of Mines

1632 Illinois St.

Golden, CO 80401

Email: [dmarr@mines.edu](mailto:dmarr@mines.edu)

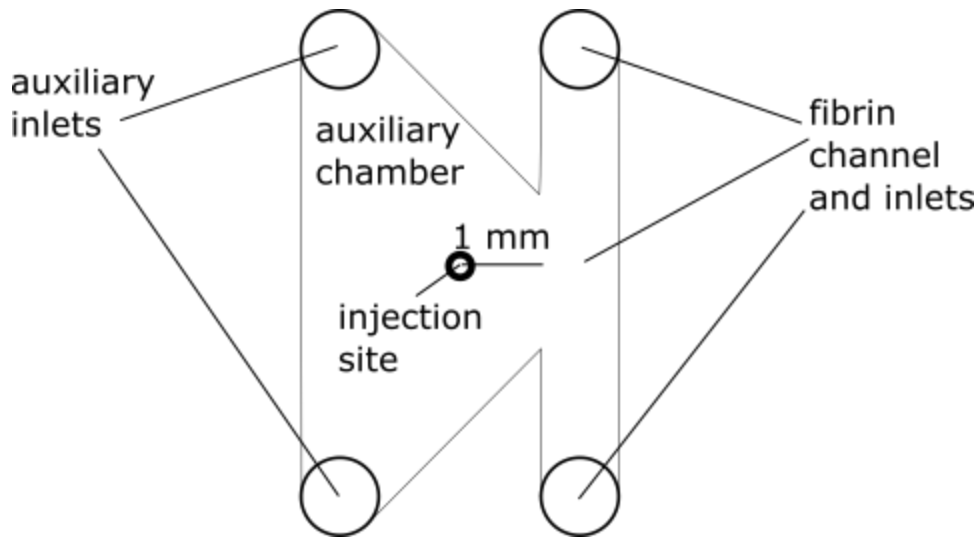

**Fig. S1:** Schematic of microfluidic device used for fibrinolysis experiments

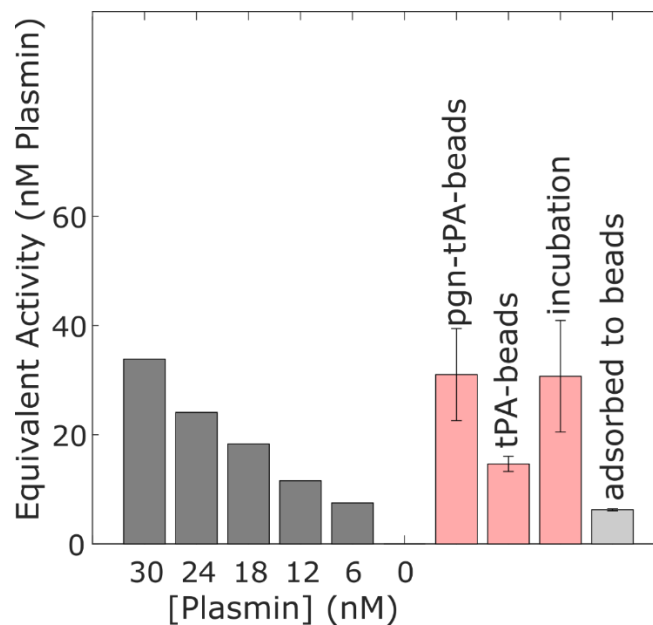

**Fig. S2:** Plasmin activity of particle samples measured using a fluorometric substrate. Data sets in salmon are 10x diluted. Sets in gray are not diluted. tPA-beads and pgn-tPA-beads are at a concentration of  $10^5/\mu\text{L}$ , and are measured in samples of recalcified (20 mM  $\text{CaCl}_2$ ) NPP treated with 9 nM thrombin. All other samples are in buffer. “Incubation” refers to the loading of mMSN with plasminogen, during which tPA-beads are soaked in 10  $\mu\text{M}$  plasminogen for 24 hr. “Adsorbed to beads” refers to tPA-beads after the 24 hr plasminogen loading step, and after three washing cycles. We observe generation of 300 nM plasmin during incubation; however, after washing, beads have a plasmin activity of only  $<10$  nM plasmin.

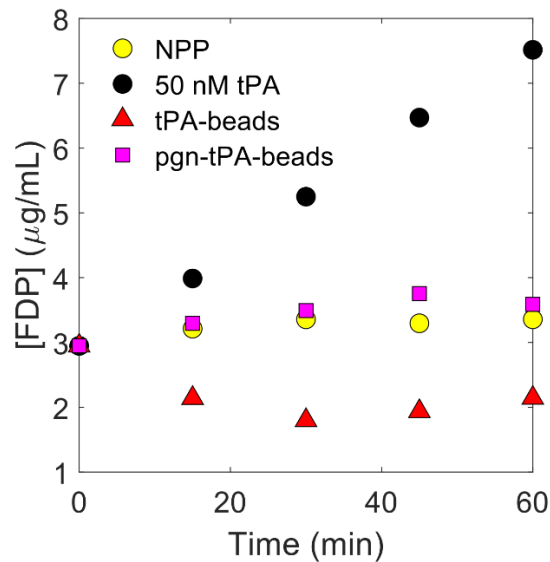

**Fig. S3:** FDP generation during the course of lysis experiments. NPP exhibits a slight increase in FDP concentration. tPA causes significant fibrinogenolysis throughout the hour-long experiment. tPA-beads initially decrease plasma FDP concentration as FDP adsorbs to bead surfaces, but exhibit FDP generation after  $t = 30$  min. Pgn-tPA-beads cause insignificant fibrinogenolysis.

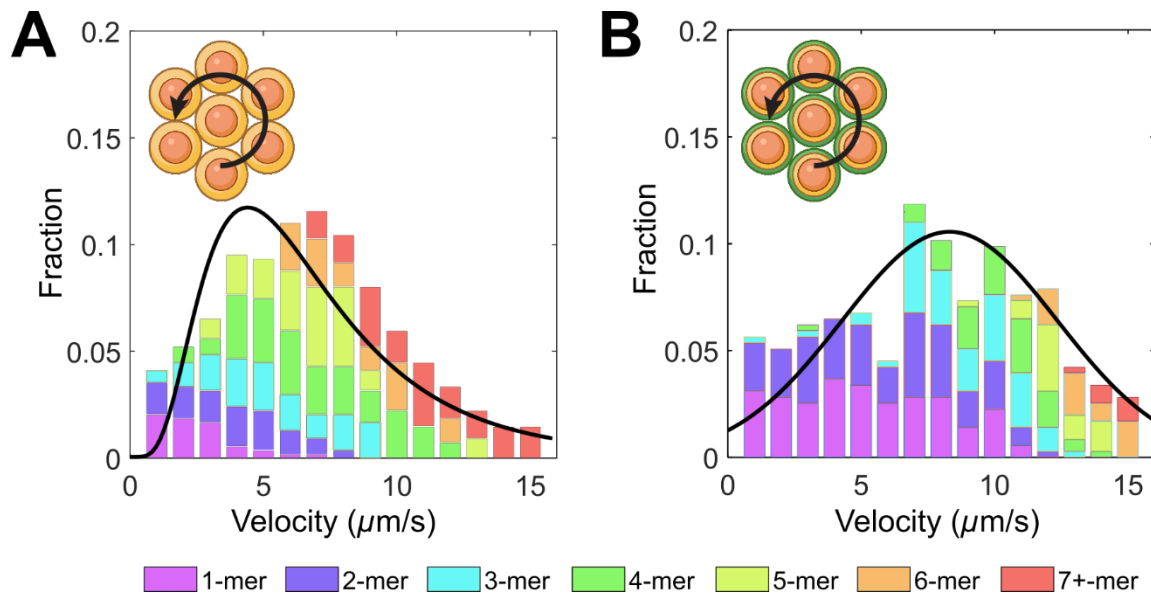

**Fig. S4:** Representative velocity profiles for A) tPA-beads and B) pgn-tPA-beads after 5 min under the applied magnetic field. A) tPA-beads have an average velocity of  $6.8 \mu\text{m/s}$ . Beads translating as components of larger  $\mu$ wheels (for example, a 7-mer is a  $\mu$ wheel composed of 7 beads) translate faster than those in smaller ones. B) pgn-tPA-beads have an average velocity of  $7.7 \mu\text{m/s}$ . pgn-tPA- $\mu$ wheels tend to remain smaller than tPA- $\mu$ wheels because the mMSN impede strong magnetic attraction between beads.
